# Supplementary material for: Green synthesis of polyvinyl alcohol (PVA)–cellulose nanofibril (CNF) hybrid aerogels and their use as superabsorbents
Source: Royal Society of Chemistry journal article supplement (doi:10.1039/c3ta14642a), 2013-12-16
Supplement: c3ta14642a.pdf [file c3ta14642a.pdf]

**Supporting Information** for

# **Green Synthesis of Polyvinyl Alcohol (PVA)–Cellulose Nanofibril (CNF) Hybrid Aerogels and Their Use as Superabsorbents**

Qifeng Zheng,<sup>a,b</sup> and Zhiyong Cai,<sup>\*,c</sup> and Shaoqin Gong<sup>\*\*a,b,d</sup>

<sup>a</sup> *Material Science Program, University of Wisconsin–Madison, WI 53706, USA.*

<sup>b</sup> *Wisconsin Institute for Discovery, University of Wisconsin–Madison, WI 53715, USA*

<sup>c</sup> *Forest Product Laboratory, USDA, Madison, WI 53726, USA*

<sup>d</sup> *Department of Biomedical Engineering, University of Wisconsin–Madison, WI 53706, USA*

Movie S1

Movie S2

Movie S3

Movie S4

---

\*Corresponding author: Zhiyong Cai. Email: zcai@fs.fed.us; Tel: +01 6082319446.

\*\*Corresponding author: Shaoqin Gong. Email: sgong@engr.wisc.edu; Tel: +01 6083164311.

### Calculation of aerogel porosity:

The density of the solid materials ( $\rho_s$ ) was calculated according to Equation S1 based on the solid density of each component and their weight ratios used in the formulation :

$$\rho_s = \frac{1}{\frac{W_{\text{silane}}}{\rho_{\text{silane}}} + \frac{W_{\text{CNF}}}{\rho_{\text{CNF}}} + \frac{W_{\text{PVA}}}{\rho_{\text{PVA}}}} \quad (\text{S1})$$

where W was the weight percentage of the different components, and  $\rho_{\text{silane}}$ ,  $\rho_{\text{CNF}}$ , and  $\rho_{\text{PVA}}$  were the solid densities of silane, CNF and PVA, respectively. The densities of the silane, CNFs and PVA used for this study were 1273, 1460 and 1269 kg m<sup>-3</sup>, respectively, according to the manufacturer's data sheet.

The porosity of aerogels was calculated according to Equation S2:

$$\text{Porosity} = \left(1 - \frac{\rho}{\rho_s}\right) \times 100\% \quad (\text{S2})$$

Where  $\rho$  was the density of aerogel, and  $\rho_s$  was the density of solid materials.

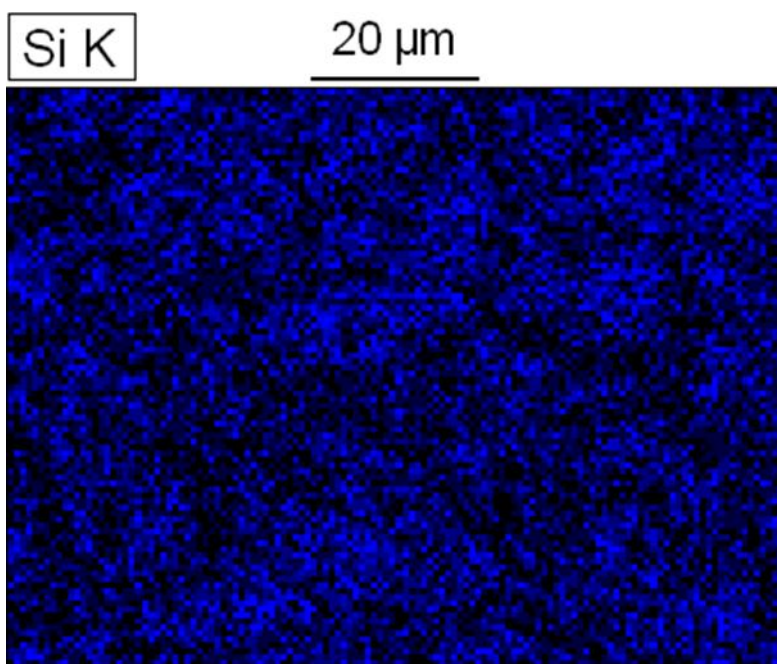

**Fig. S1** Silicon mapping image of the silane-coated PVA/CNF aerogel.

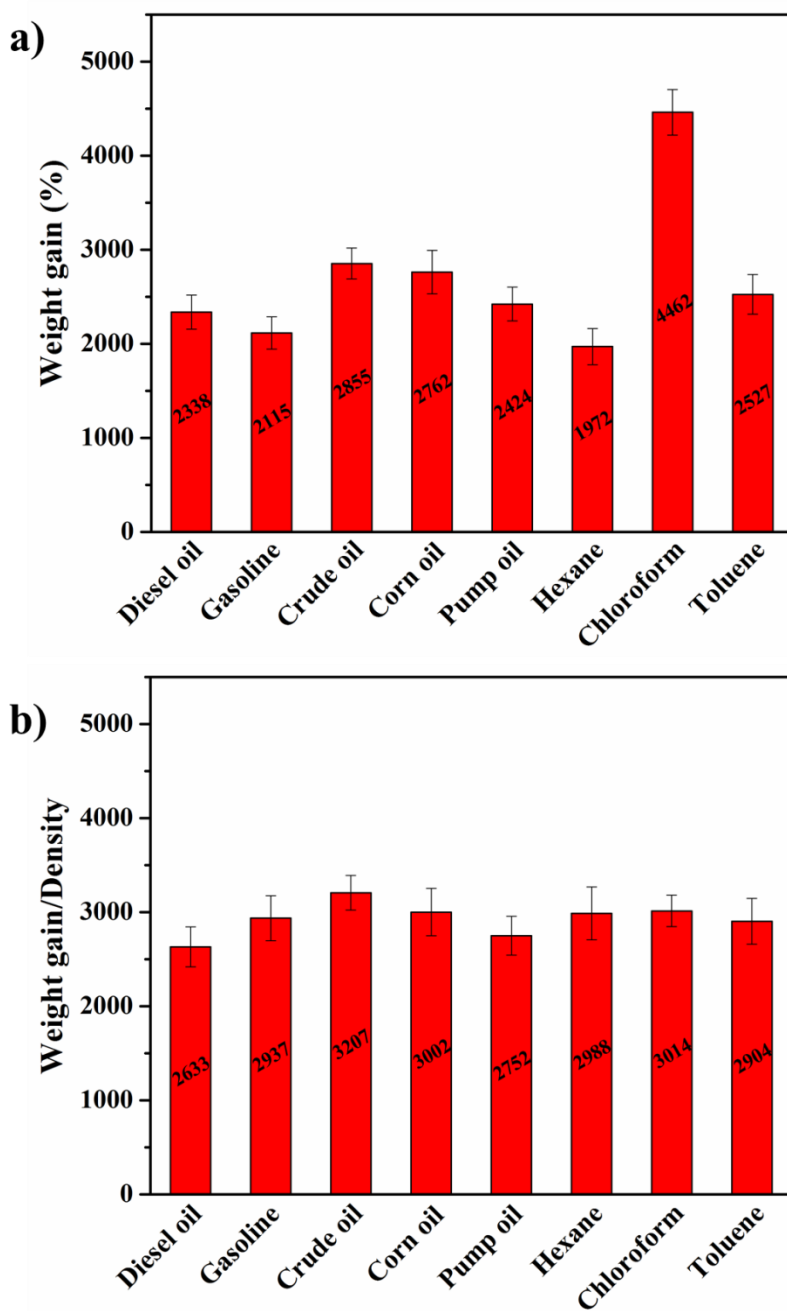

**Fig. S2** (a) Absorption capacities of the PVA aerogels for various organic solvents and oils as indicated by weight gain. (b) Absorption capacities normalized by the density of the respective oil or organic solvent.
